# Supplementary material
Source: PubMed Central journal article supplement (PMC6784538)
Supplement: NIHMS1053234-supplement-STM_supplemental.pdf [file NIHMS1053234-supplement-STM_supplemental.pdf]

## Supplementary Materials for

### CFTR-PTEN–dependent mitochondrial metabolic dysfunction promotes *Pseudomonas aeruginosa* airway infection

Sebastián A. Riquelme, Carmen Lozano, Ahmed M. Moustafa, Kalle Liimatta, Kira L. Tomlinson, Clemente Britto, Sara Khanal, Simren K. Gill, Apurva Narechania, Jose M. Azcona-Gutiérrez, Emily DiMango, Yolanda Saénz, Paul Planet, Alice Prince\*

\*Corresponding author. Email: asp7@columbia.edu

Published 3 July 2019, *Sci. Transl. Med.* **11**, eaav4634 (2019)

DOI: 10.1126/scitranslmed.aav4634

#### The PDF file includes:

##### Materials and Methods

Fig. S1. PTEN affects mitochondrial membrane potential and assimilation of metabolites.

Fig. S2. HIF1 $\alpha$  is not increased in PTEN-null cells.

Fig. S3. PTEN regulates succinate secretion during infection with *P. aeruginosa*.

Fig. S4. PTEN is reduced in patients with *CFTR* mutations.

Fig. S5. Succinate in BAL is increased in *P. aeruginosa*–infected *CFTR* <sup>$\Delta$ F508/ $\Delta$ F508</sup> mice.

Fig. S6. High succinate induces oxidative stress and metabolic adaptation in *P. aeruginosa* in LB and CF sputum–like media.

Fig. S7. Succinate-stressed WT *P. aeruginosa* produce larger colonies in succinate-free LB agar plates.

Fig. S8. Succinate-stressed *P. aeruginosa* biofilms are more tolerant to succinate.

Fig. S9. The PTEN-succinate axis does not regulate *S. aureus* adaptation to the airway.

Fig. S10. Phenotypic characterization of *P. aeruginosa* strains recovered over 4 years from the CF airway.

Fig. S11. Mucoid and SCV CF isolates have differential preference for succinate, acetate, and L-threonine compared with PAO1.

Fig. S12. CF-adapted *P. aeruginosa* excrete succinate.

Fig. S13. Host-adapted *P. aeruginosa* induce less secretion of proinflammatory cytokines in the airway.

Fig. S14. IL-1 $\beta$  induced by metabolically adapted *P. aeruginosa* isolates is not trapped inside neutrophils.

Fig. S15. IRG1 expression by resident alveolar macrophages and neutrophils in *P. aeruginosa*–infected mice.

Fig. S16. Clinical isolates of *P. aeruginosa* do not induce cell death in IRG1<sup>+</sup> BAL monocytes.

Table S1. *CFTR* genotype and *P. aeruginosa* airway abundance in healthy patients and patients with CF.

Table S2. Pathoadaptive mutations conserved in all 17 CF *P. aeruginosa*.

Table S3. Accession numbers for *P. aeruginosa* isolates.

Table S4. PAMPs found mutated in all CF *P. aeruginosa* isolates.

Table S5. Sequences of the primers used for qRT-PCR.

**Other Supplementary Material for this manuscript includes the following:**

(available at [www.sciencetranslationalmedicine.org/cgi/content/full/11/499/eaav4634/DC1](http://www.sciencetranslationalmedicine.org/cgi/content/full/11/499/eaav4634/DC1))

Data file S1 (Microsoft Excel format). Raw data from figures.

## SUPPLEMENTARY MATERIALS

### Materials and Methods

**Reagents used in this study** - For flow cytometry, antibody used were: anti-mouse CD45 AF700 (BioLegend), anti-mouse CD11c Bv605 (BioLegend), anti-mouse SiglecF (BD Bioscience), anti-mouse CD11b AF594 (BioLegend), anti-mouse MHC II APC/Cy7 (BioLegend), anti-mouse Ly6C Bv421 (BioLegend), anti-mouse Ly6G PerCP/Cy5.5 (BioLegend), anti-mouse CD193 FITC (BioLegend), anti-mouse pro-IL-1b PE/Cy7 (eBioscience), anti-mouse PTEN (Abcam), anti-mouse/human IRG1 (Abcam), anti-human SDHA (Abcam), anti-human IDH (Abcam). For Western blots, antibodies used were: anti-mouse actin (Sigma), anti-mouse IL-1 $\beta$  (R&D), anti-mouse HIF1 $\alpha$  (Cayman Chemicals), HRP-coupled goat anti-rabbit (Santa Cruz Biotechnology), HRP-coupled goat anti-mouse (Santa Cruz Biotechnology). For Confocal Microscopy, antibodies PTEN (Novus Biologicals), mouse anti-human CFTR (Abcam), rabbit anti-human TOMM20 (Abcam), donkey anti-goat AF488 H+L, donkey anti-mouse AF647 H+L, donkey anti-rabbit AF546 H+L. Succinate was obtained from Sigma. Succinate measurements were performed by using the Abcam Succinate Kit.

***Pseudomonas aeruginosa* strains** - The PAO1 laboratory strain was grown in LB overnight and sub-cultured until exponential phase for infection experiments. 17 host-adapted *P. aeruginosa* strains were recovered between 2012 and 2015 from sputum of a chronic-infected CF patient (p.Q493VfsX10/3849+10kbC>T *CFTR*). These strains were plated in LB agar and their phenotype was characterized regarding SCV and mucoid morphology. These 17 strains were previously characterized (44) for growth curves, capacity to form biofilm, pigment production, swimming and swarming motility, and expression of virulence genes. These bacteria were grown in LB and sub-cultured as was PAO1.

**ROS production and quantification in bacteria** - PAO1 was grown overnight in succinate-free LB media under agitation at 37°C in a sterile tube. OD<sub>600nm</sub> was measured and an aliquot was spun down and resuspend in 3ml of LB alone, LB + 50mM succinate or LB + 500mM succinate with a final OD<sub>600nm</sub> of 1.0. Bacteria were agitated in tubes at 37°C for 2h, and an aliquot was washed with cool PBS and resuspended in 5uM of MytoSox red-PBS (Life Technologies) and incubated at 37°C for 20min. After staining, bacteria were washed twice in cold PBS and analyzed by flow cytometry. Non-stained controls were used for each treatment.

**CF artificial sputum media** - Airway artificial media mimicking CF sputum conditions was prepared as previously described (33). One liter of this media contained 4 g fish DNA, 5 g type-II mucin from porcine stomach, 0.25 g of each of 20 aminoacids, 5.9 mg diethylenetriaminepentaacetic acid (DTPA), 5 g NaCl, 2.2g KCl, 5ml egg yolk emulsion, and pH 6.9 buffered with 1 M Tris (pH 8.5). CF ASM was sterilized with by vacuum-filtration during 2 days in a sterile and closed hood. CF ASM media was stored at 4°C.

**Carbon source assimilation by different strains of *P. aeruginosa*** - Either PAO1, PAO1\*, PAO1<sup>Succ</sup> (generated in either LB or CF ASM), mucoid 605 or SCV 686 were grown until exponential phase, OD<sub>600nm</sub> measured and applied to a 96-well plate array where each well contained a single carbon source (PM1 plates, Biolog Inc). For preparation of bacteria, solutions and plates the instructions of the manufacturer were followed. Plates were incubated at 37°C for 48h-72h.

**DNA extraction and whole genome sequencing** - All isolates were grown overnight in LB broth at 37° C. Genomic DNA was extracted using the Wizard Genomic DNA Purification Kit (Promega) according to manufacturer instructions. Genomic DNA libraries were prepped using the Nextera XT kit and sequenced on a HiSeq 2500 sequencer (Illumina) with 125-bp paired-end reads. Genome assembly was done using the paired-end implementation of ABySS.

**Single-Nucleotide Polymorphism (SNP) Calling** - Comparison of SNPs between isolates was done by means of short-read alignment to the genome of PAO1 as reference (GenBank: AE004091), using the Burrows–Wheeler alignment (bwa) tool (available at: <http://bio-bwa.sourceforge.net>). SNP calls were made using samtools (available at: <http://samtools.sourceforge.net>). SNPs that were not listed as heterozygous and had a per base Q score  $\geq 20$  were defined as high quality.

**Heatmap** - Two heatmaps (protein change and no protein change) based on the number of observed SNPs in each genome were built. The SNPs (in one taxon or more) with quality scores  $< 20$  and/or listed as “heterozygote” were excluded. In addition, the genomic regions that are identical across the 17 taxa were excluded. For clarity, 29 genomic (nonsynonymous=4; synonymous=25) regions with  $> 3$  SNPs were excluded. Genomic regions were clustered using the complete hierarchical clustering method of the pheatmap R package based on the number of

observed SNPs in each genome. The Euclidean distance matrix was used in clustering data for dendrogram generation.

**Protein extraction and western blots** - Total BAL and lung tissue were removed from WT infected mice after 24h infection. Total cell from either BAL and lungs were washed and resuspended for 30min in 300uL of RIPA buffer containing protease/phosphatase inhibitors at 4°C. Samples were centrifuged for 20min at 15000g and the supernatant was recovered. Samples were prepared, denatured at 37C for 20min and ran in 4-12% gels in MES buffer for actin and IL-1 $\beta$  and MOPS for HIF1 $\alpha$ . Membranes were transferred using i-blot and stained overnight with primary antibodies. After that, samples were washed and incubated for 1h with the HRP-tagged secondary antibody. Membranes were revealed and analyzed for protein expression.

**Flow cytometry, cell recruitment and intracellular IL-1 $\beta$  staining** - BAL and lung tissues were obtained, depleted of red blood cells and the cells recovered. In 96-well plates, cells were stained for viability (DAPI) and for surface cellular markers, such as alveolar macrophages (CD45+CD11b<sup>low/-</sup>SiglecF<sup>high</sup>CD11c<sup>+</sup>CD193<sup>-</sup>Ly6G<sup>-</sup>Ly6C<sup>-</sup>), eosinophils (CD45+CD11b<sup>low/-</sup>SiglecF<sup>low/-</sup>CD11c<sup>-</sup>CD193<sup>+</sup>Ly6G<sup>-</sup>Ly6C<sup>-</sup>), neutrophils (CD45+CD11b<sup>high</sup>SiglecF<sup>low/-</sup>CD11c<sup>-</sup>MHCII<sup>-</sup>CD193<sup>-</sup>Ly6G<sup>+</sup>Ly6C<sup>low/-</sup>) and monocytes (CD45+CD11b<sup>high</sup>SiglecF<sup>low/-</sup>CD11c<sup>-</sup>MHCII<sup>-</sup>CD193<sup>-</sup>Ly6G<sup>-</sup>Ly6C<sup>low/high</sup>). When indicated, cells were fixed and permeabilized with Fix/Perm kit (eBioscience) and stained intracellularly for pro-IL-1 $\beta$ . Samples were fixed and analyzed in a LSRII machine. Data was analyzed with FlowJo version X.

**RNA extraction and qRT-PCR for metabolic and structural genes in *P. aeruginosa*** - Strains were grown in succinate-free LB in presence and absence of succinate (80 mg/mL; 500mM) until exponential phase. Total RNA was extracted using RNeasy Mini Kit (QIAGEN) and was treated with DNase (DNA-free, Ambion). The absence of contaminating DNA was checked by conventional PCRs. The RNA concentration was measured using a NanoDrop ND-1000 V3.7.1. cDNA was synthesized using Precision nanoScript Reverse Transcription kit (PrimerDesign) and qPCR was performed with an ABI 7300 Real-Time PCR System (Applied Biosystems) using Power SYBR green PCR master mix (Applied Biosystems). Sequences of the primers used for qRT-PCRs are listed in **table S5**. Relative gene expression was calculated by 2<sup>- $\Delta\Delta$ CT</sup> method. The *rpsL* gene was used as reference housekeeping gene and *P. aeruginosa* PAO1 strain was used as calibrator.

**Metabolomics for nutrients found in BAL of control and infected mice** - WT mice were intranasally infected with  $10^7$  CFU of either PAO1 or an equal mixture of all 17 CF isolates ( $5.9 \times 10^5$  CFU each). Control mice were treated with PBS. 24h later, mice were sacrificed and BAL were collected with 3ml of sterile PBS. Samples were immediately placed on ice. Then, samples were diluted with 50% methanol in a 1:1 proportion, mixed and stored at -80C for future metabolomics analysis. Just prior to mass spectrometry, samples were thawed and dried under a stream of  $N_2$  and were resuspended in HPLC-grade water at a 4:1 dilution (relative to the original BAL volume). High-resolution mass spectrometry data were acquired on a Thermo Fisher Exactive Mass spectrometer in negative mode using 25 min reverse phase gradients and ion-pairing chromatography. Metabolites were identified using the known chromatographic retention times of standards, and metabolite signals were quantified using MAVEN. Metabolite signal intensities were used to quantify difference between treatments in BAL.

**Antimicrobial susceptibility for host-adapted *P. aeruginosa*** - Susceptibility testing was carried out by disc-diffusion agar method. Antipseudomonal agents tested were ticarcillin, piperacillin, piperacillin/tazobactam, ceftazidime, cefepime, aztreonam, imipenem, meropenem, doripenem, gentamicin, tobramycin, amikacin, netilmicin, ciprofloxacin, and colistin.

**Seahorse experiments** - Human monocytes (THP-1 cells) were infected for 3h at multiplicity of infection (MOI)=10 with either PAO1, host adapted SCV 686 or mucoid 605. During the infection cells were analyzed in a Seahorse machine using commercially obtained plates as recommended by the manufacturer to evaluate glycolysis and the oxygen consumption rate.

**Succinate measurements in BAL** – As indicated, either anesthetized WT C57bl/6, *Pten*<sup>-/-</sup> or *Cftr* <sup>$\Delta F508/\Delta F508$</sup> -gut corrected mice were infected intranasally with either  $1 \times 10^7$  CFU of laboratory strain PAO1, a total  $1 \times 10^7$  CFU mix of all 17 isolates (equal parts –  $5.9 \times 10^5$  for each),  $1 \times 10^7$  CFU of SCV variant 686,  $1 \times 10^7$  CFU of mucoid strain 605 or a total  $1 \times 10^7$  CFU mix of both 686 + 605 ( $5 \times 10^6$  of each). 24h/48h after, BAL was recovered and analyzed for succinate content by using an enzymatic- colorimetric assay (Abcam). Plates were read in a TECAN plate reader. Before the lavage, a 25G needle was introduced through the trachea and the total local respiratory fluid during infection was quantified in some mice. As a representative group, the average volume obtained from a least 10 mice was 15uL (minimal of 1uL and maximum of 50uL). Thus, after 3ml of PBS lavage, the concentration of

succinate quantified in BAL was amplified by a factor of 200 (3ml/15uL), to reflect the average initial concentration. After the 3ml PBS lavage, BAL was spun down at 1400rpm for 10min at 4°C and supernatants were used for analyses.

**Succinate secretion as a function of media** - Both PAO1, SCV 686 and mucoid 605 were grown overnight in LB. Then, cells were washed, OD adjusted to 1.0 and a small aliquot (5uL) subcultured overnight in minimal media M9 supplemented either with  $\alpha$ -D-glucose (16mM) or acetate (34mM). Media was also supplemented with MgSO<sub>4</sub> and CaCl<sub>2</sub> as indicated by the provider. Culture was made in a U-bottom 96-well plate under agitation. Next day, samples were passed to a 96-well flat-bottom plate and read in a TECAN machine OD<sub>600nm</sub>. In addition, succinate content in the supernatant was quantified by using an enzymatic- colorimetric assay (Abcam).

**Quantification of succinate in PBMCs supernatants and human BAL** - PBMCs derived from blood of CF patients or healthy volunteers were separated in a ficoll gradient. Cells were washed several times and counted. 400,000 cells were plated in round-bottom 96-well plates and treated either with PBS or WT *P. aeruginosa* for 2h, MOI=10 and in RPMI media without antibiotics. Then, cells were washed and fresh RPMI supplemented with gentamicin was added. Cells were incubated overnight. Next day, supernatants were recovered and stored at -80°C. Succinate in supernatant was measured with a colorimetric assay.

Human BAL from healthy controls and CF patients were obtained from clinics, centrifuged at maximum speed and 50uL of supernatants were analyzed for succinate accumulation by using the Abcam colorimetric assay.

**PTEN KO cell line infection and succinate secretion experiments** - Two cells lines lacking PTEN (*PTEN*<sup>+/+</sup> and *PTEN*<sup>-/-</sup> HCT116 and DLD1 cells) were plated in 6-well plates, counted, and infected or not at MOI=10 with WT *P. aeruginosa* (PAO1) in antibiotic free media at 37°C with 5% CO<sub>2</sub>. After 2h, cells were washed and incubated in gentamicin-containing media overnight. The next day, 50uL of the supernatant was collected and analyzed for succinate content. Where indicated, cells were fixed, permeabilized and stained intracellularly for IRG1, SDHA and IDH. Cells were analyzed by flow cytometry. In these cells, succinate dehydrogenase activity was analyzed in total protein extracts (Abcam).

**CFBE cells and metabolic assays** -  $\Delta$ F508/ $\Delta$ F508 *CFTR* epithelial cells were transduced with a WT *CFTR*-coding lentivirus or an empty-control. Cells were selected with puromycin. Where indicated, cells were fixed,

permeabilized and stained intracellularly for IRG1 (Abcam), SDHA (Abcam) and IDH (Abcam). Cells were analyzed by flow cytometry for these markers. In these cells, succinate dehydrogenase activity was analyzed in total protein extracts (Abcam). When indicated, non-corrected CFBE cells were infected with an MOI of 20,000 with a PTEN-GFP or a GFP-coding adenovirus for 48h. Then, cells were washed and stained for mitochondrial membrane potential and mitochondrial ROS. The GFP<sup>+</sup> population (cells expressing GFP or PTEN-GFP) was analyzed for mitochondrial ROS production. The non-transduced population (GFP<sup>-</sup>) was also analyzed for mitochondrial ROS.

**Confocal Microscopy** - 16HBE cells (epithelial cells) were grown on sterile-coverslips in 12-well plates until reaching 50-60% confluence. Cells were fixed for 20min with 2% PFA at 4°C, washed with PBS and permeabilized at RT with 0.05% Saponin-PBS-2% FBS for 15min. Coverslips were passed to a humid-chamber and stained with 50uL containing 1/200 goat anti-human PTEN, mouse anti-human CFTR and rabbit anti-human Tomm20. Antibodies were resuspended in permeabilization buffer. Cells were incubated at 4°C overnight. Cells were washed with 200uL PBS and 50uL of mix containing 1/500 of donkey anti-goat AF488 H+L, donkey anti-mouse AF647 H+L and donkey anti-rabbit AF546 H+L (Life technologies). Antibodies were resuspended in permeabilization buffer. Staining was for 3h. Cells were washed with PBS, dried and mounted with DAPI-containing anti-Fade Pro-long. Cells were analyzed in a Nikon Confocal Microscopy 60x magnification. Data analyses for colocalization were performed with Fiji software.



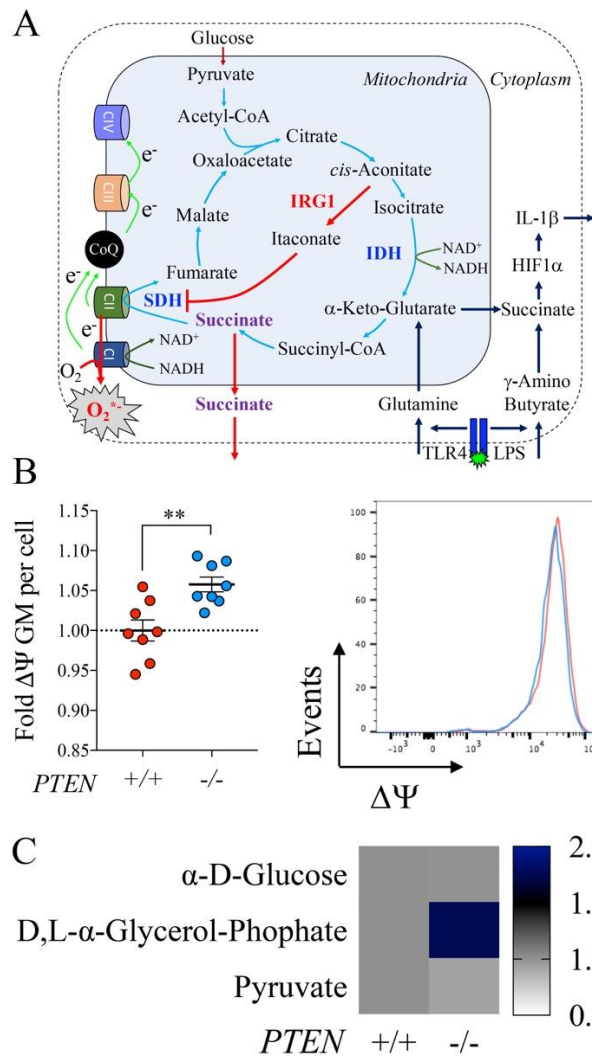

**Fig. S1. PTEN affects mitochondrial membrane potential and assimilation of metabolites. A)** Scheme showing regulation of mitochondrial TCA cycle. SDH-mediated ROS ( $O_2^{*-}$ ) production is regulated by IRG1. SDH and IDH are pro-oxidant and highlighted in blue. IRG1 is anti-oxidant and highlighted in red lines. Light blue arrows show the normal course of reaction through the TCA cycle. Bottom red arrows show succinate secreted from cells. **B)**  $PTEN^{+/+}$  and  $PTEN^{-/-}$  HTC116 cells were stained for mitochondrial membrane potential ( $\Delta\Psi$ ) and analyzed by flow cytometry. **C)**  $PTEN^{+/+}$  and  $PTEN^{-/-}$  HTC116 cells were placed in 96-well PM-M1 Biolog plates. The assimilation of specific single metabolites was analyzed and quantified. Data are shown as mean  $\pm$  SEM of three independent experiments. Student's t-test, \*\*  $P < 0.01$ .

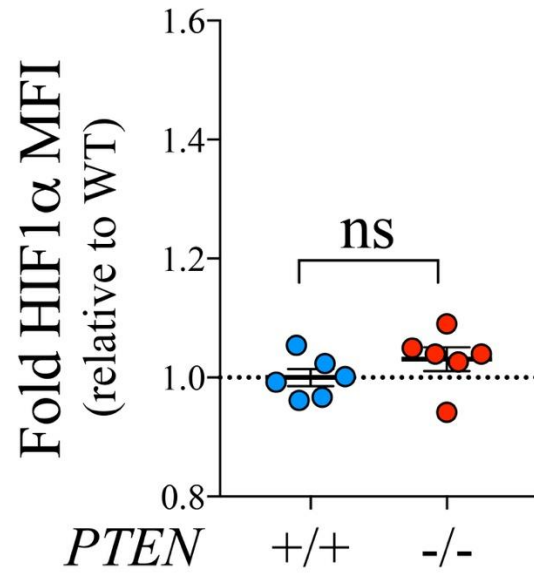

**Fig. S2. HIF1 $\alpha$  is not increased in PTEN-null cells.** *PTEN*<sup>+/+</sup> and *PTEN*<sup>-/-</sup> HTC116 cells were stained for intracellular hypoxia-induced factor 1 $\alpha$  (HIF1 $\alpha$ ) and analyzed by flow cytometry. Data are shown as mean  $\pm$  SEM of three independent experiments, with 6 replicates in total. Student's t-test, *ns*: non-significant.

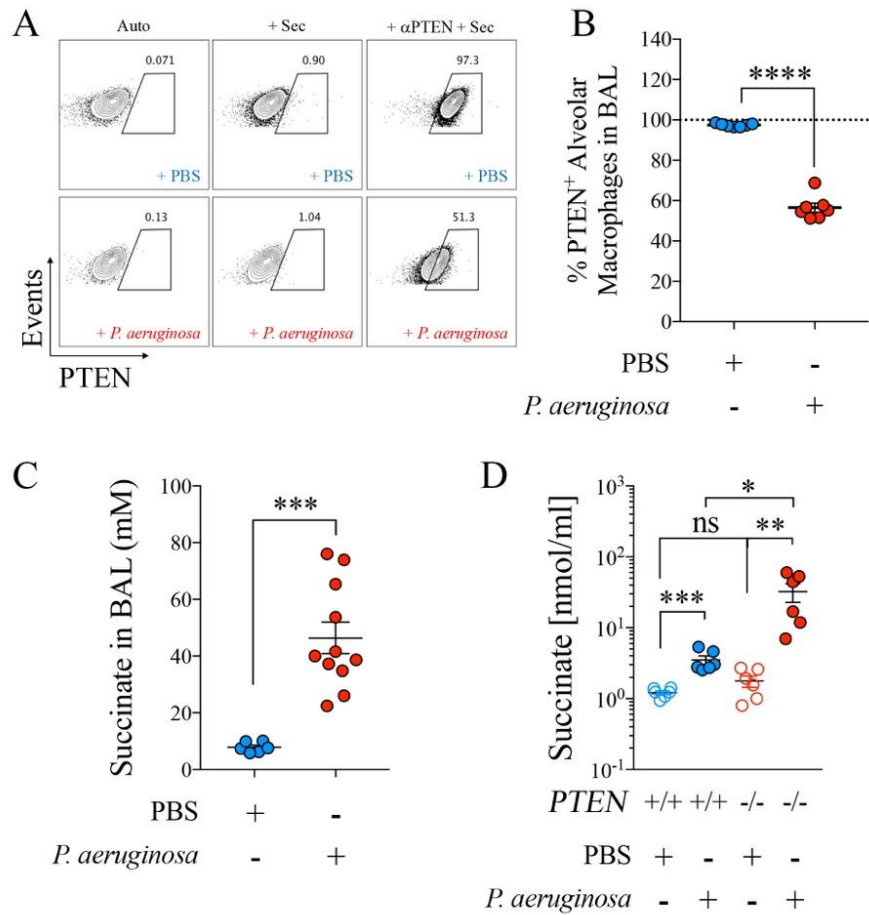

**Fig. S3. PTEN regulates succinate secretion during infection with *P. aeruginosa*.** **A)** WT mice were intranasally infected with  $10^7$  CFU of *P. aeruginosa* (PAO1). 24h later, alveolar macrophages recovered from BAL were intracellularly stained for PTEN. Auto = autofluorescence (non-stained alveolar macrophages); Sec = alveolar macrophages treated only with secondary antibody; Prim + Sec = alveolar macrophages treated with anti-PTEN and secondary antibody. **B)** Percent PTEN<sup>+</sup> alveolar macrophages (from **A**) in BAL quantification. **C)** From mice infected in **A**, succinate was quantified in BAL. **D)** *PTEN*<sup>+/+</sup> and *PTEN*<sup>-/-</sup> DLD1 epithelial human cells were left untreated or infected with *P. aeruginosa* for 2h, washed, treated with gentamicin overnight and then succinate was quantified in the supernatants. For **A-C**, data is from two independent experiments with 8-11 mice in total. Data in **D** is from 2 independent experiments with 6 replicates in total. Data is shown as mean +/- SEM. Student's t-test or one-way ANOVA, \*\*\*\*  $P < 0.0001$ ; \*\*\*  $P < 0.001$ ; \*\*  $P < 0.01$ ; \*  $P < 0.05$ ; ns: non-significant.

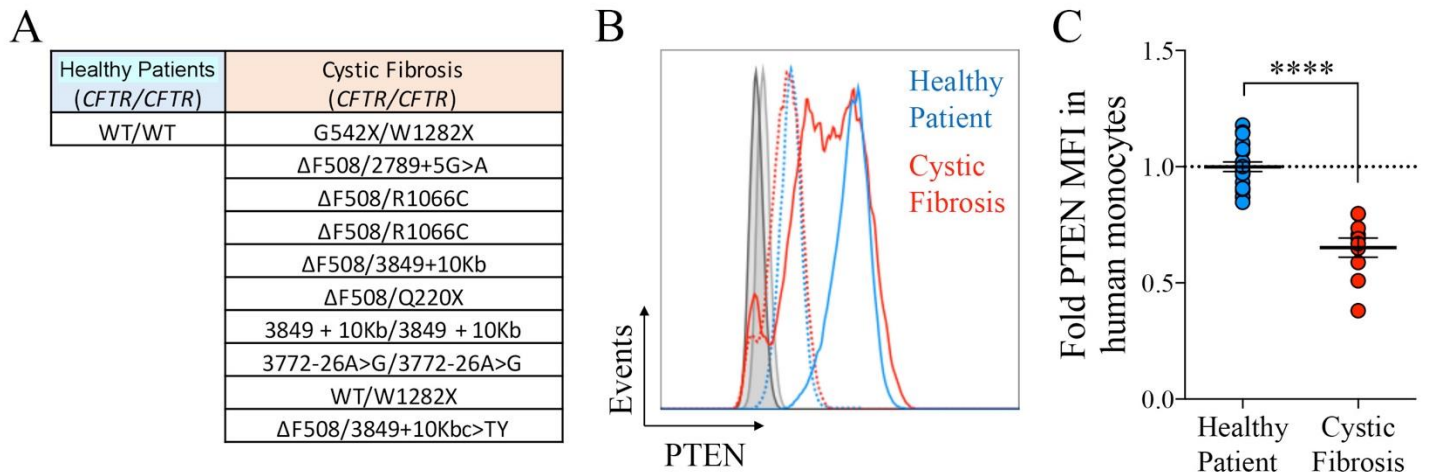

**Fig. S4. PTEN is reduced in patients with *CFTR* mutations. A)** *CFTR* genotype of patients with CF (n=10) and several healthy volunteers analyzed for PTEN expression. All healthy controls were not suffering from CF (*CFTR* WT/WT). **B)** Representative histogram for PBMCs from the blood of healthy and CF patients. PBMCs were purified and intracellularly stained for PTEN and analyzed by flow cytometry. **C)** Quantification of PTEN MFI in PBMCs obtained from healthy volunteers (n=24) and CF patients (n=10). Each point represents one patient. Data is shown as mean +/- SEM. Student's t-test, \*\*\*\*  $P < 0.0001$ .

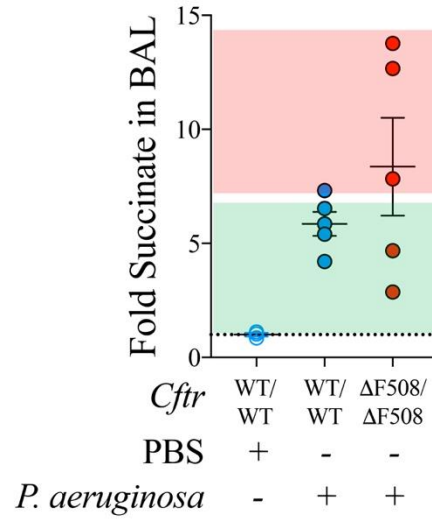

**Fig. S5. Succinate in BAL is increased in *P. aeruginosa*-infected  $CFTR^{\Delta F508/\Delta F508}$  mice.** WT (n=5) and  $CFTR^{\Delta F508/\Delta F508}$  mice (gut-corrected) (n=5) were challenged intranasally with  $10^7$  *P. aeruginosa* CFU/animal, and 24h later succinate was quantified in bronchoalveolar lavage.

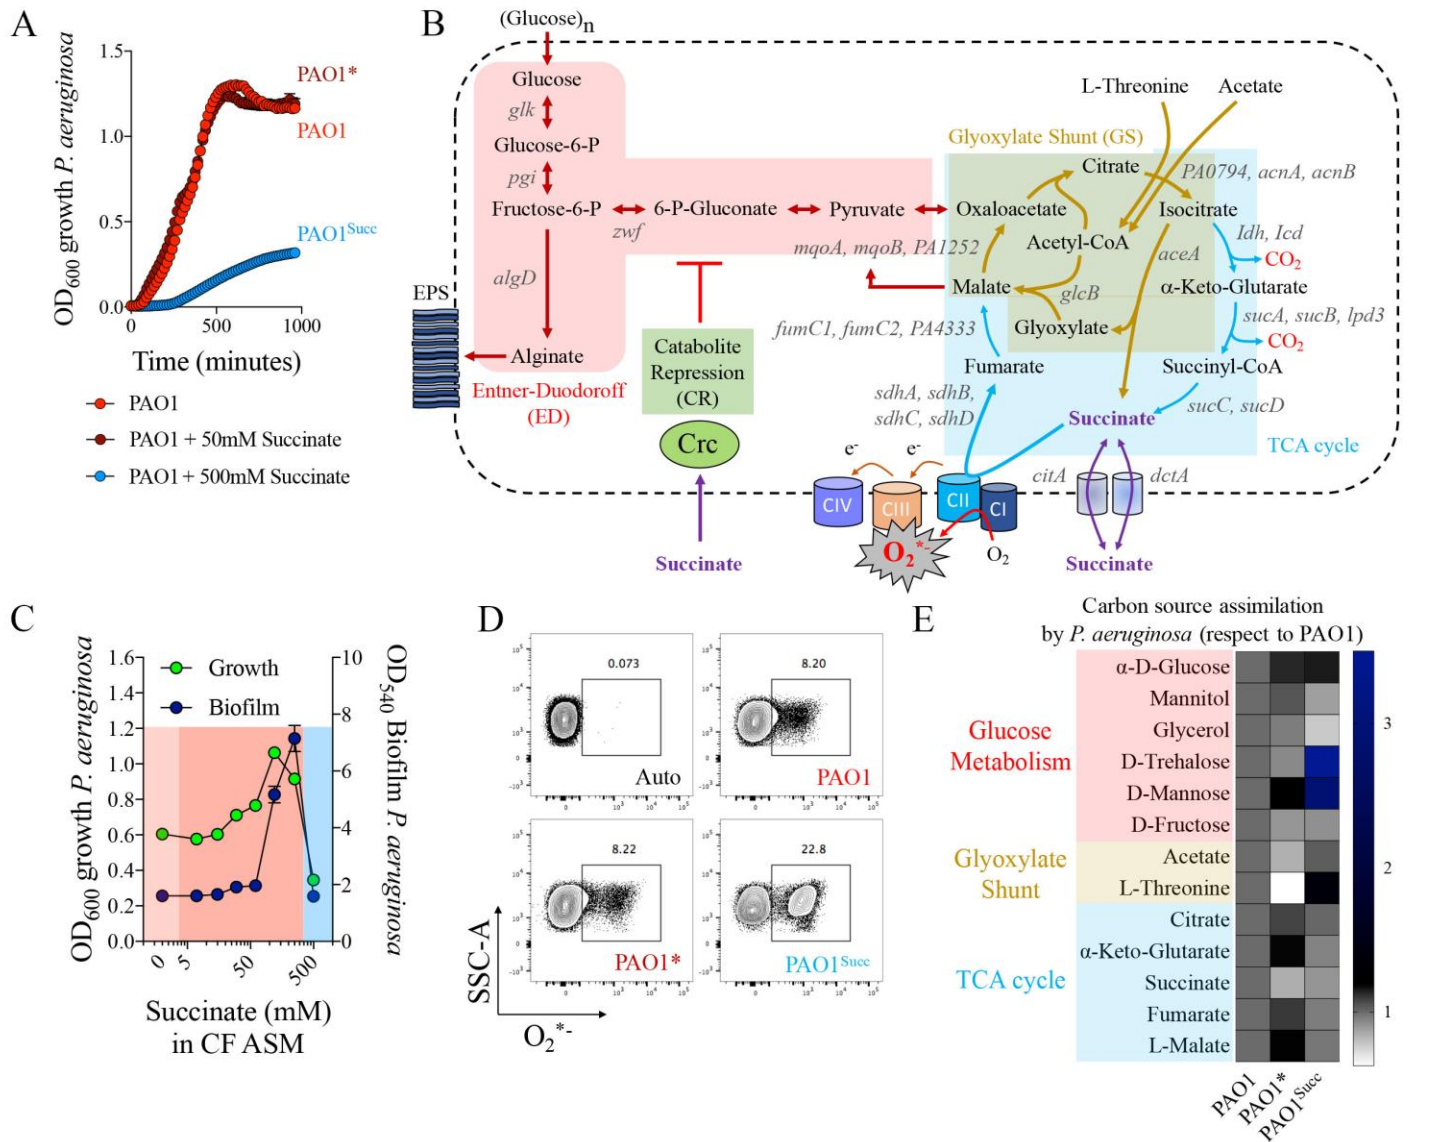

**Fig. S6. High succinate induces oxidative stress and metabolic adaptation in *P. aeruginosa* in LB and CF sputum-like media.** **A)** Growth curves of WT *P. aeruginosa* (PAO1) in LB without succinate (PAO1), 50mM succinate (PAO1\*) or 500mM succinate (PAO1<sup>Succ</sup>). **B)** *P. aeruginosa* metabolic activity. SDH-mediated  $O_2^{*-}$  generation by succinate is bypassed by using the glyoxylate shunt, which feeds alginate production through gluconeogenesis. **C)** PAO1 was grown overnight in increasing concentrations of succinate in CF artificial sputum media (CF ASM) and growth and biofilm was quantified. **D)** PAO1 was incubated either in LB, LB + 50mM or LB + 500mM succinate for 2h. Then, bacteria were washed and stained with MytoSox to detect anion superoxide ( $O_2^{*-}$ ) by flow cytometry. **E)** After overnight growth in CF sputum-like media supplemented without or +50mM/500mM succinate, analysis of bacterial assimilation was performed. Data in **A**, **B** and **D** represents two independent experiments and in **C**, three independent experiments.

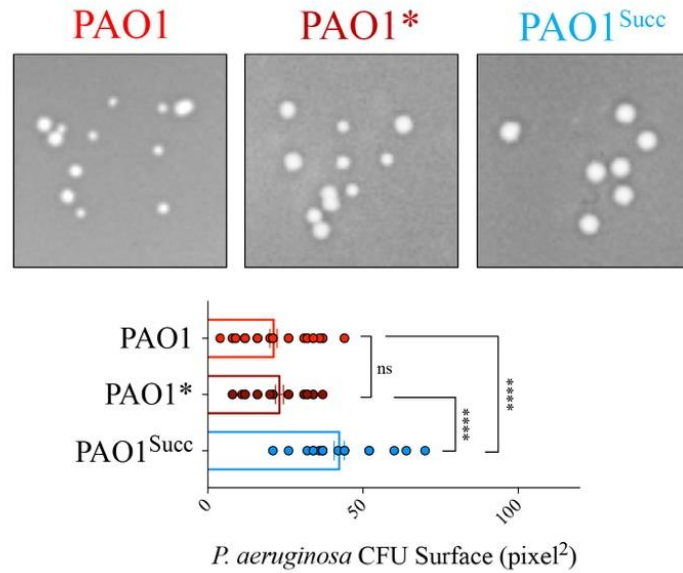

**Fig. S7. Succinate-stressed WT *P. aeruginosa* produce larger colonies in succinate-free LB agar plates.** WT *P. aeruginosa* (PAO1) were stressed overnight either in 50mM (PAO1\*) or 500mM (PAO1<sup>Succ</sup>) succinate or not (PAO1), washed and plated on succinate-free LB agar plates. After 24h incubation at 37°C, colony sizes were measured. The bottom graph displays the average CFU sizes for the different PAO1. Data are from 3 independent experiments. Data are shown as mean +/- SEM. Data were analyzed by one-way ANOVA. \*\*\*\*:  $P < 0.0001$ ; ns: non-significant.

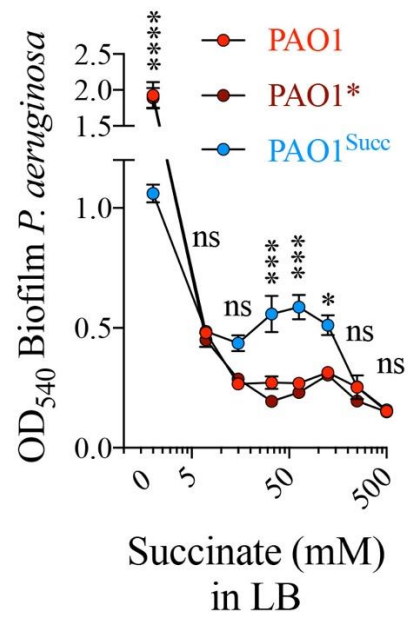

**Fig. S8. Succinate-stressed *P. aeruginosa* biofilms are more tolerant to succinate.** PAO1 was incubated overnight either in LB (PAO1), LB + 50mM succinate (PAO1\*) or LB + 500mM succinate (PAO1<sup>Succ</sup>). Then, bacteria were washed and re-incubated in increased concentrations of succinate overnight. Biofilms production was measured. Data were analyzed by two-way ANOVA and represent three independent experiments. Data are shown as mean +/- SEM. \*\*\*\*:  $P < 0.0001$ ; \*\*\*:  $P < 0.001$ ; \*\*:  $P < 0.01$ ; \*:  $P < 0.05$ ; ns: non-significant.



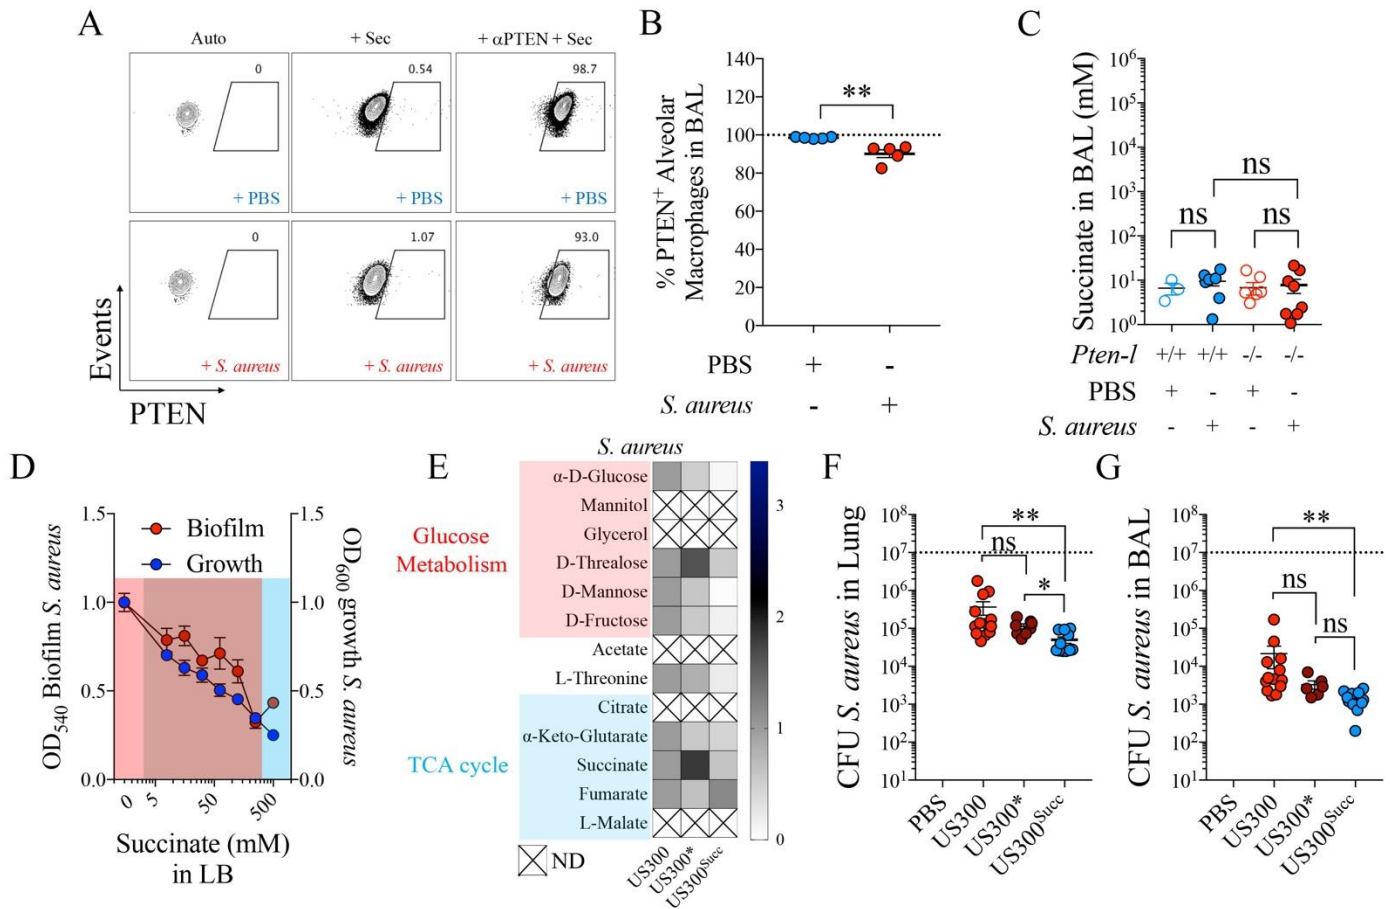

**Fig. S9. The PTEN-succinate axis does not regulate *S. aureus* adaptation to the airway.** **A)** Alveolar macrophages from PBS-treated or *S. aureus* (MRSA)-infected BAL were intracellularly stained for PTEN and analyzed by flow cytometry. **B)** Percentage of PTEN<sup>+</sup> alveolar macrophages from untreated or *S. aureus*-infected mice from **A**. **C)** BAL succinate concentration from WT or *Pten1*-deficient mice treated 24h intranasally either with PBS or *S. aureus*. **D)** *S. aureus* were grown overnight in LB containing increasing concentrations of succinate. Growth and biofilm were quantified. **E)** *S. aureus* growth overnight in LB (US300), LB + 50mM succinate (US300\*) or LB + 500mM succinate (US300<sup>Succ</sup>) were plated on PM1 Biolog plates to measure metabolite consumption. ND: non-detected. **F-G)** Mice were intranasally infected with 107 CFU of USA300, USA300\* or USA300<sup>Succ</sup>. 24h later, mice were sacrificed and bacterial loads were quantified in lung and BAL. Data represents three independent experiments. Data is shown as mean +/- SEM. **A**, Student's t-test; **C**, **F** and **G**, one-way ANOVA. \*:  $P < 0.05$ ; \*\*:  $P < 0.01$ ; \*\*\*:  $P < 0.001$ ; \*\*\*\*:  $P < 0.0001$ ; ns: non-significant.

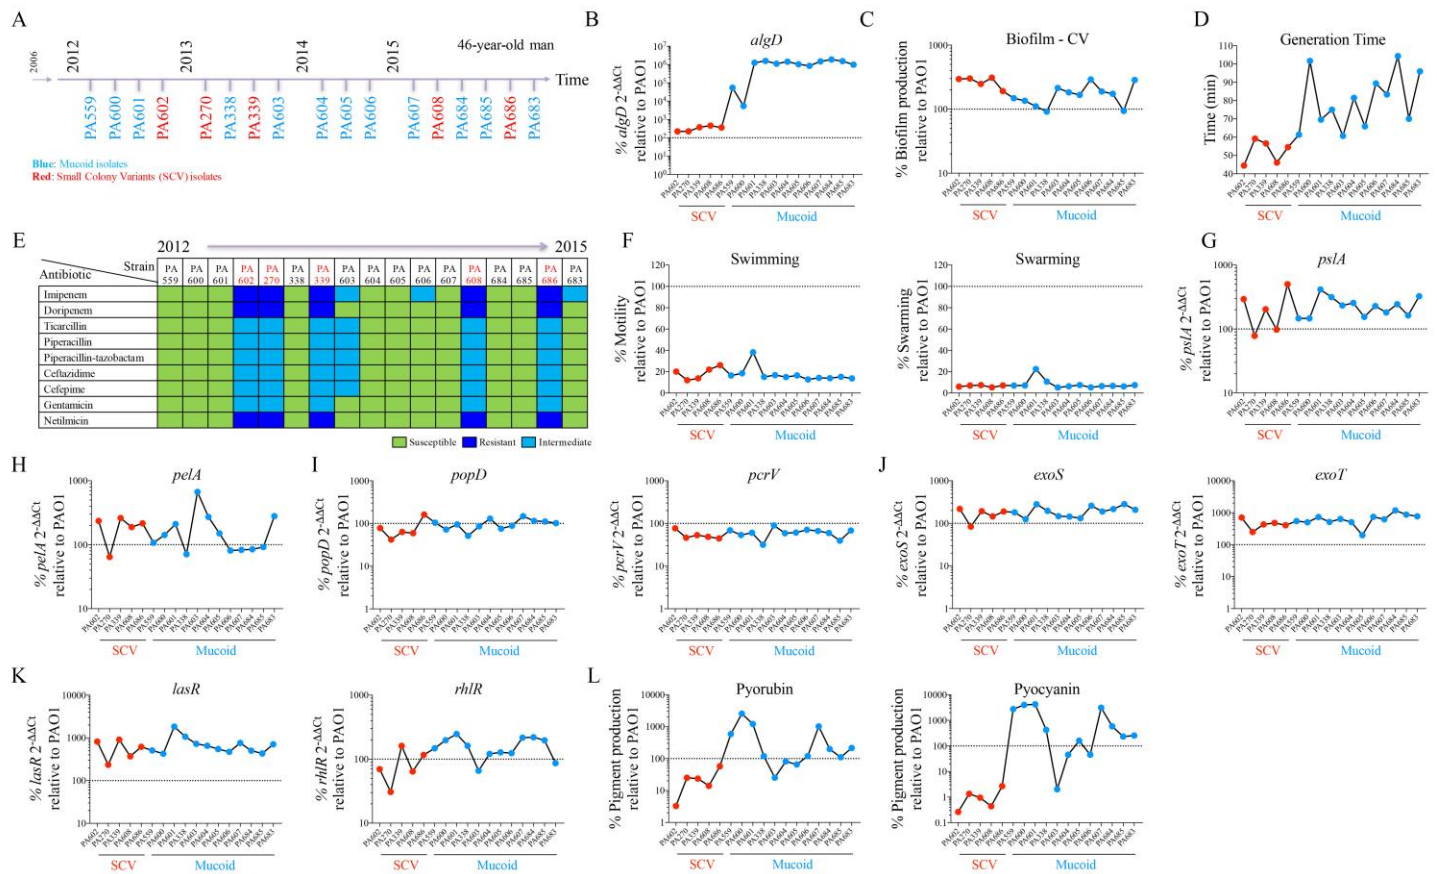

**Fig. S10. Phenotypic characterization of *P. aeruginosa* strains recovered over 4 years from the CF airway. A)** From a chronically infected, 46-year-old CF patient, 17 *P. aeruginosa* isolates were collected from 2012 to 2015. Based on plate morphology, strains were classified as small colony variants (SCV) or mucoid. **B)** *AlgD* expression profile for each isolate and compared with PAO1. **C)** Capacity of biofilm production for each isolate through crystal violet (CV). **D)** Generation time measured for each isolate. **E)** Antibiogram for each isolate against different antibiotics used in CF clinics. **F)** Swimming and swarming motility profile for each isolate. **G-H)** Biofilm *pslA* and *pelA* genes expression profile for each isolate. **I)** *popD* and *pcrV* expression profile, components of the type-three secretion system (TTSS) needle, for each isolate. **J)** *exoT* and *exoS* expression profile, virulence factors secreted with the TTSS needle, for each isolate. **K)** *lasR* and *rhlR* expression profile, components of the quorum system (QS) and pro-biofilm, for each isolate. **L)** Pyorubin and pyocyanin pigment production profile. Data is shown as the mean of three independent measurements for each strain.

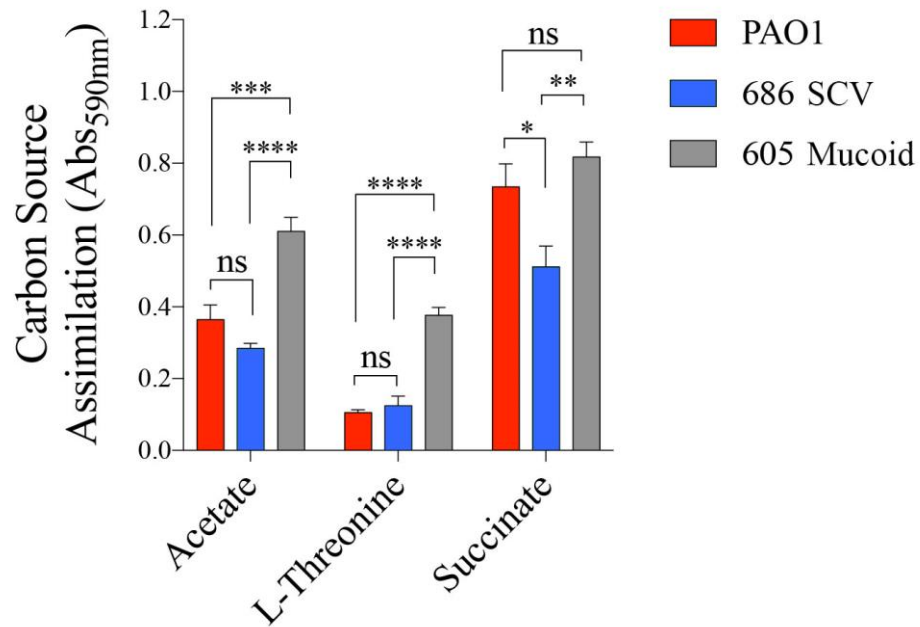

**Fig. S11. Mucoide and SCV CF isolates have differential preference for succinate, acetate, and L-threonine compared with PAO1.** PAO1, SCV 686, or mucoide 605 were inoculated in a 96-well Biolog PM1 plate. Nutrient utilization was followed for 48h-72h by absorbance at OD<sub>590nm</sub>. Data represent five independent experiments and values are shown as mean +/- SEM. One-way ANOVA, \*\*\*\*:  $P < 0.0001$ ; \*\*\*:  $P < 0.001$ ; \*\*:  $P < 0.01$ ; \*:  $P < 0.05$ ; ns: non-significant.

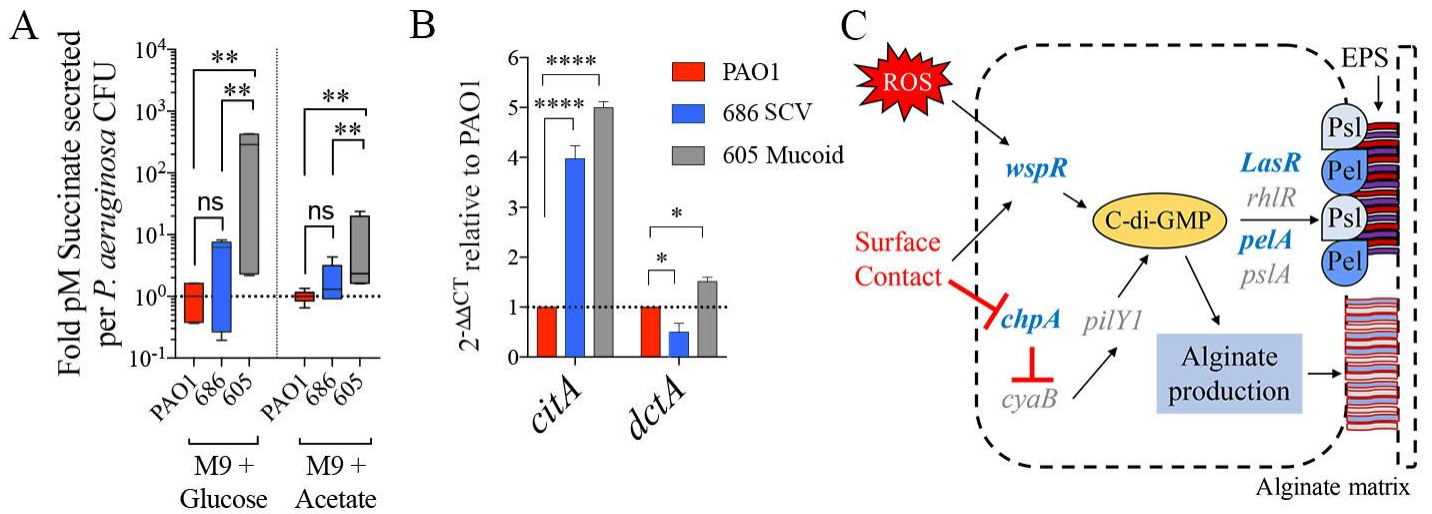

**Fig. S12. CF-adapted *P. aeruginosa* excrete succinate.** **A)** PAO1, 686 or 605 strains were incubated overnight in minimal media (M9) supplemented either with  $\alpha$ -D-glucose or acetate and succinate accumulation was quantified in the supernatant. Succinate concentrations were standardized against the amount of CFU per sample. **B)** Fold change in mRNA expression for the citrate/succinate antiporter *citA* and *dctA* C4 dicarboxylate transporter for SCV 686 and mucoïd 605 relative to PAO1. These genes had the same nonsynonymous mutations in all CF isolates. **C)** Diagram of pathways regulating c-di-GMP and biofilm production in *P. aeruginosa*. Data represent 3 independent experiments and values are shown as mean  $\pm$  SEM. Data were analyzed by one-way ANOVA. \*\*\*\*:  $P < 0.0001$ ; \*\*:  $P < 0.01$ ; \*:  $P < 0.05$ ; ns: non-significant.

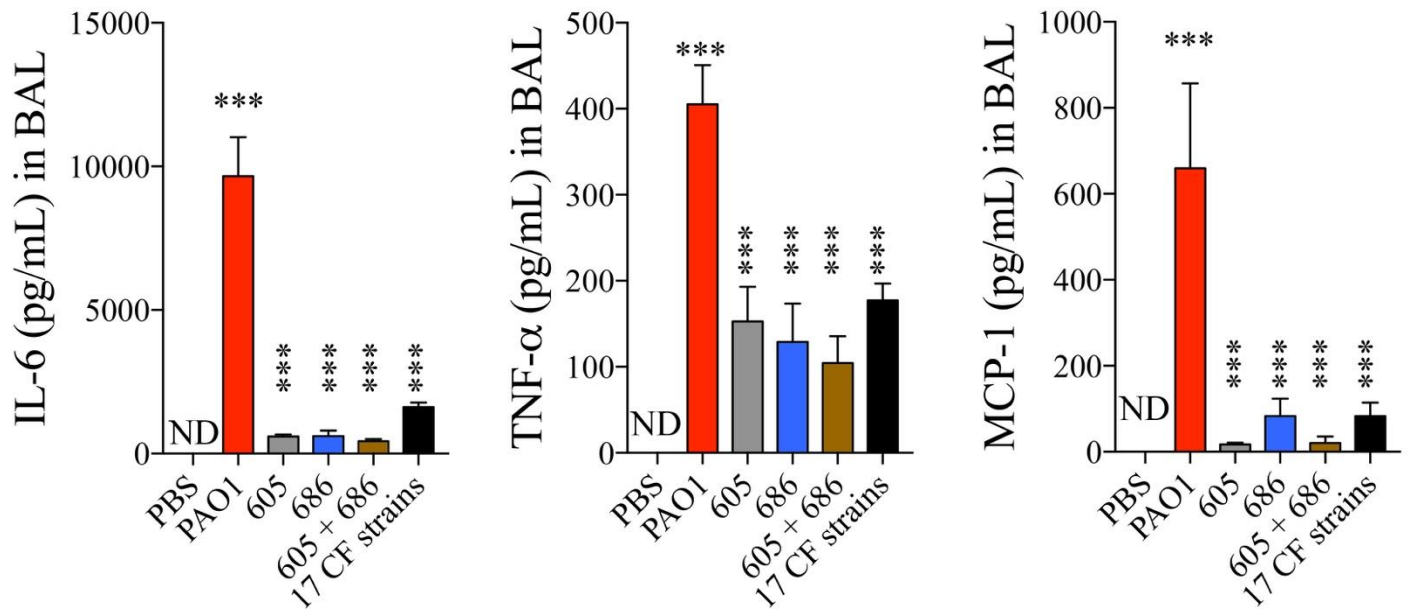

**Fig. S13. Host-adapted *P. aeruginosa* induce less secretion of proinflammatory cytokines in the airway.** C57bl/6 mice were intranasally infected with  $1 \times 10^7$  CFU of either laboratory strain PAO1,  $1 \times 10^7$  CFU of SCV variant 686,  $1 \times 10^7$  CFU of mucoid strain 605, a total  $1 \times 10^7$  CFU mix of both 686 + 605 ( $5 \times 10^6$  of each) or with a total  $1 \times 10^7$  CFU mix of all 17 isolates (equal parts at  $5.9 \times 10^5$  for each). IL-6, TNF- $\alpha$  and MCP-1 concentration in bronchoalveolar lavage was analyzed by ELISA. Data is from two independent experiments each with  $n=3$  (6 mice in total) and shown as mean  $\pm$  SEM. One-way ANOVA. \*\*\*\*\*:  $P < 0.0001$ ; \*\*\*:  $P < 0.001$ . \*\*:  $P < 0.01$ ; \*:  $P < 0.05$ ; ns: non-significant. ND: non-detected.



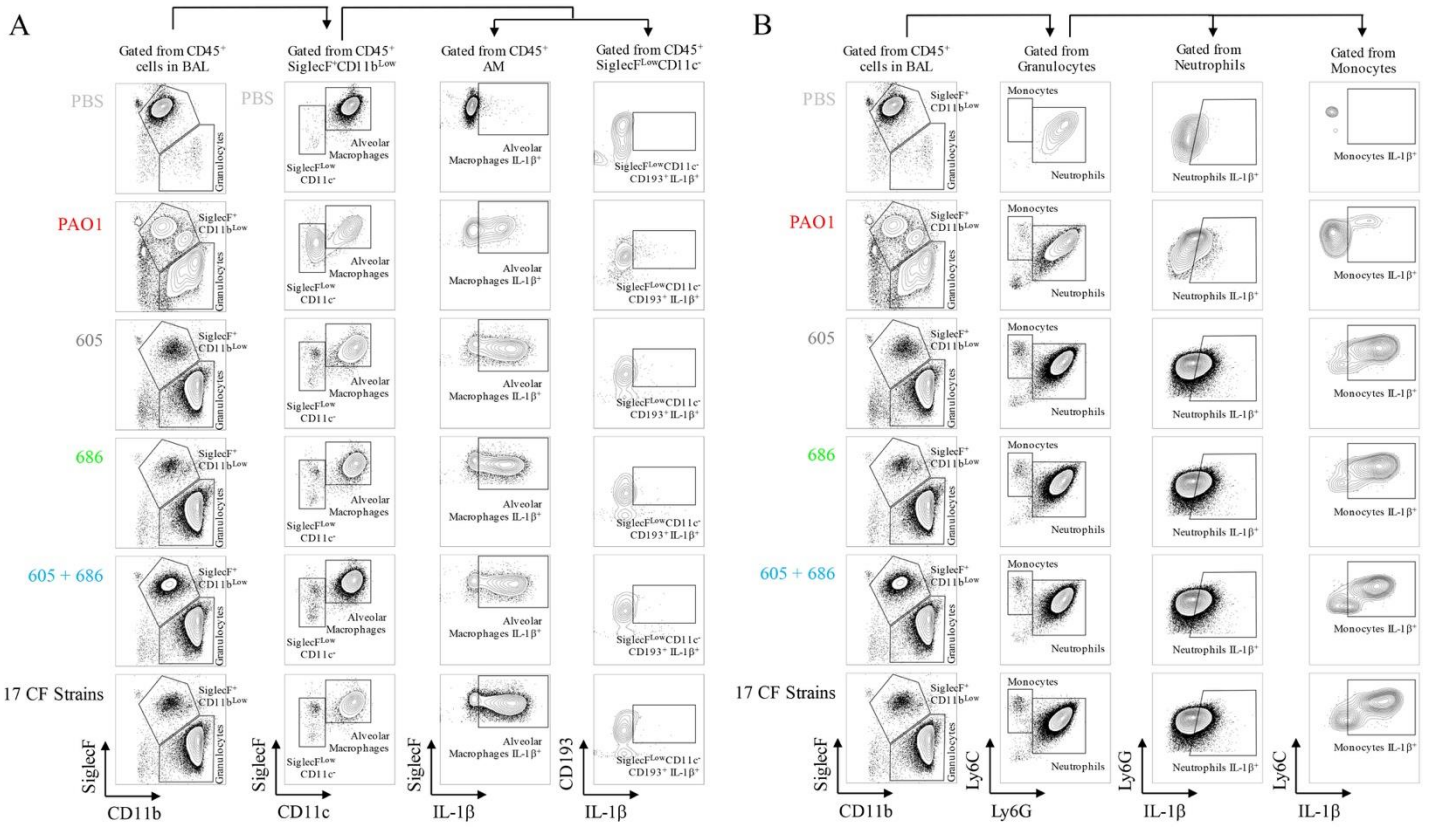

**Fig. S14. IL-1β induced by metabolically adapted *P. aeruginosa* isolates is not trapped inside neutrophils.** C57bl/6 mice were intranasally infected with either  $1 \times 10^7$  CFU of laboratory strain PAO1,  $1 \times 10^7$  CFU of SCV variant 686,  $1 \times 10^7$  CFU of mucoid strain 605, a total  $1 \times 10^7$  CFU mix of both 686 + 605 ( $5 \times 10^6$  of each), or with a total  $1 \times 10^7$  CFU mix of all 17 isolates (equal parts –  $5.9 \times 10^5$  each). Intracellular staining for pro-IL-1β was performed in (A) alveolar CD11c<sup>+</sup>SiglecF<sup>+</sup> macrophages and CD11c<sup>+</sup>SiglecF<sup>Low</sup>CD193<sup>+</sup> eosinophils, and (B) monocytes Ly6G<sup>+</sup>Ly6C<sup>+</sup> and Ly6G<sup>+</sup>Ly6C<sup>+</sup> neutrophils. Gating strategy is shown. Data shown is representative of two independent experiments, n=3 for each experiment (6 mice in total).

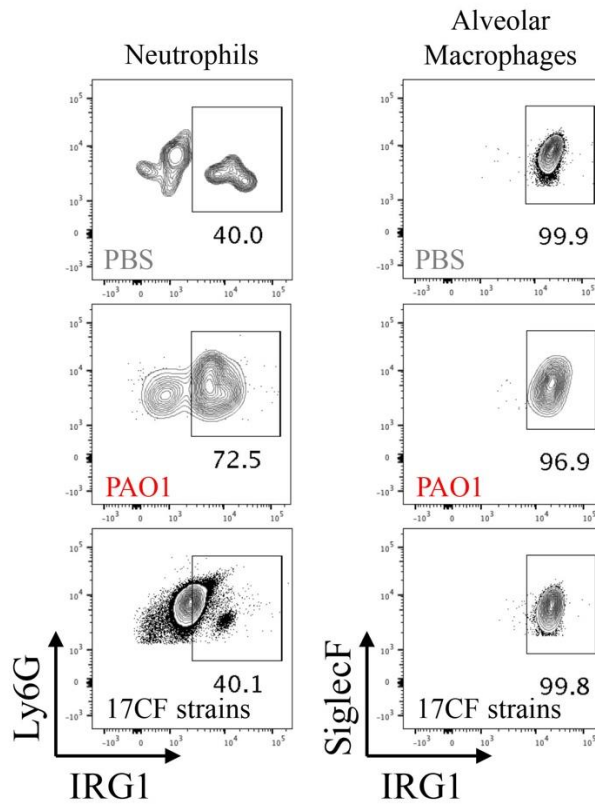

**Fig. S15. IRG1 expression by resident alveolar macrophages and neutrophils in *P. aeruginosa*-infected mice.** C57bl/6 mice were intranasally treated with PBS or infected with  $1 \times 10^7$  CFU of PAO1 or with a total  $1 \times 10^7$  CFU mix of all 17 isolates (equal parts –  $5.9 \times 10^5$  for each). Intracellular staining for IRG1 was performed in Ly6G<sup>+</sup>Ly6C<sup>+</sup> recruited neutrophils (left) and alveolar CD11c<sup>+</sup>SiglecF<sup>+</sup> macrophages (right). Data shown are representative of two independent experiments, with 6 mice in total.

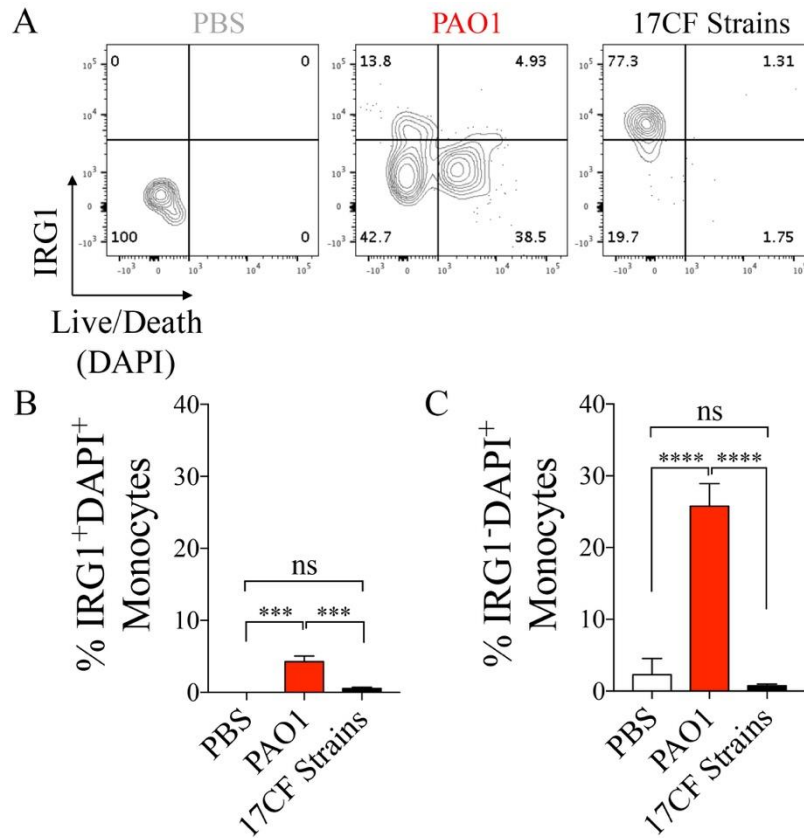

**Fig. S16. Clinical isolates of *P. aeruginosa* do not induce cell death in IRG1<sup>+</sup> BAL monocytes.** C57bl/6 mice were intranasally infected with  $1 \times 10^7$  CFU of laboratory strain PAO1 or a total mix of all 17 isolates (equal parts –  $5.9 \times 10^5$  for each). **A)** BAL monocytes were stained for IRG1 and cell viability (DAPI, cell membrane permeabilization). **B-C)** Percentage of IRG1<sup>+</sup>DAPI<sup>+</sup> and IRG1<sup>-</sup>DAPI<sup>+</sup> monocytes. Data shown is representative of two independent experiments,  $n=3$  for each experiment (6 mice in total). Graphs are shown as mean  $\pm$  SEM. Data were analyzed by one-way ANOVA. \*\*\*\*:  $P < 0.0001$ ; ns: non-significant.



**Table S1. *CFTR* genotype and *P. aeruginosa* airway abundance in healthy patients and patients with CF.** Healthy volunteers (n=8) and patients with CF (n=25) were tested for *P. aeruginosa* positive or negative culture and *P. aeruginosa* 16S abundance. When possible, the *CFTR* genotype was obtained from patients with CF.

| Patient           | PA culture | % PA 16S Abundance | <i>CFTR</i> Allele 1 | <i>CFTR</i> Allele 2 |
|-------------------|------------|--------------------|----------------------|----------------------|
| Healthy Patient 1 | Negative   | 0.99378882         | WT                   | WT                   |
| Healthy Patient 2 | Negative   | 0                  | WT                   | WT                   |
| Healthy Patient 3 | Negative   | 0                  | WT                   | WT                   |
| Healthy Patient 4 | Negative   | 0.894409938        | WT                   | WT                   |
| Healthy Patient 5 | Negative   | 0                  | WT                   | WT                   |
| Healthy Patient 7 | Negative   | 0                  | WT                   | WT                   |
| Healthy Patient 8 | Negative   | 0                  | WT                   | WT                   |
| CF Patient 1      | Negative   | 0                  | Undetermined         | Undetermined         |
| CF Patient 2      | Negative   | 5.639751553        | Undetermined         | Undetermined         |
| CF Patient 3      | Negative   | 0                  | Undetermined         | Undetermined         |
| CF Patient 4      | Negative   | 0                  | Undetermined         | Undetermined         |
| CF Patient 5      | Negative   | 0.006056935        | F508del              | G542X                |
| CF Patient 6      | Negative   | 0.079997539        | Undetermined         | Undetermined         |
| CF Patient 7      | Negative   | 0.015895724        | Undetermined         | Undetermined         |
| CF Patient 8      | Negative   | 0.012759578        | W1282X               | W1282X               |
| CF Patient 9      | Negative   | 0.029135407        | Undetermined         | Undetermined         |
| CF Patient 10     | Negative   | 0.968961714        | Undetermined         | Undetermined         |
| CF Patient 11     | Positive   | 7.164387751        | Undetermined         | Undetermined         |
| CF Patient 12     | Negative   | 0                  | F508del              | F508del              |
| CF Patient 13     | Negative   | 0.178448868        | F508del              | F508del              |
| CF Patient 14     | Negative   | 0.023296835        | F508del              | Y849X                |
| CF Patient 15     | Negative   | 0.24152991         | F508del              | F508del              |
| CF Patient 16     | Negative   | 0.04165089         | F508del              | PY849X               |
| CF Patient 17     | Negative   | 0.032664794        | Undetermined         | Undetermined         |
| CF Patient 18     | Negative   | 0.023824479        | Undetermined         | Undetermined         |
| CF Patient 19     | Positive   | 10.63455303        | 3120+1G->A           | 3120+1G->A           |
| CF Patient 20     | Negative   | 0.008981498        | Undetermined         | Undetermined         |
| CF Patient 21     | Positive   | 97.0713525         | Undetermined         | Undetermined         |
| CF Patient 22     | Negative   | 0.013170459        | Undetermined         | Undetermined         |
| CF Patient 23     | Negative   | 0.696069256        | Undetermined         | Undetermined         |
| CF Patient 24     | Negative   | Undetermined       | Undetermined         | Undetermined         |
| CF Patient 25     | Negative   | Undetermined       | Undetermined         | Undetermined         |

**Table S2. Pathoadaptive mutations conserved in all 17 CF *P. aeruginosa*.** Number of synonymous (SM) and non-synonymous mutations (NSM) found in different genes in all 17 *P. aeruginosa* isolates respect with control PAO1. Changes found were equally conserved in all *P. aeruginosa* isolates.

| Pathway                                          | Genes (NSM/SM)                                                                                                                                                                             |
|--------------------------------------------------|--------------------------------------------------------------------------------------------------------------------------------------------------------------------------------------------|
| Antibiotic resistance                            | PA2491 ( <i>mexS</i> ) (1/0)<br><i>mexT</i> (1/6)<br><i>ampD</i> (1/2)<br><i>pmrA</i> (1/4)<br><i>gyrB</i> (1/7)<br><i>parE</i> (1/16)<br><i>mpl</i> (2/5)                                 |
| Transport                                        | PA0313 ( <i>yecS</i> ) (1/0)                                                                                                                                                               |
| Mucoidity and biofilm                            | <i>morA</i> (1/11)<br>PA0861( <i>rbdA</i> ) (3/16)<br><i>retS</i> (1/9)<br><i>alg8EXIWP</i> (1/1, 2/8, 1/6, 3/2, 1/0, 2/3)<br><i>muck</i> (2/11)                                           |
| c-di-GMP signaling pathway and biofilm           | <i>wspACFR</i> (1/3, 1/7, 1/2, 1/2)<br><i>pslCFHIM</i> (4/1, 2/1, 1/1, 1/0, 2/4)<br><i>pelABDEF</i> (4/11, 5/5, 5/15, 4/2, 1/3)<br><i>chpAC</i> (6/19, 2/4)                                |
| Quorum sensing and biofilm                       | <i>lasR</i> (1/0)<br><i>rhlACGI</i> (1/3, 2/3, 3/0, 3/7)<br><i>pqsDE</i> (1/4, 1/0)<br><i>phnA</i> (2/1)                                                                                   |
| Flagella assembly                                | <i>figJL</i> (1/1,13/22)<br><i>fliC</i> (22/33)<br>PA1095 (3/2)<br><i>fliE</i> (1/1)<br>PA1103 (1/1)<br>PA1441 (3/11)<br><i>flhF</i> (4/1)<br><i>motDCA</i> (1/2,1/0,3/14)<br>PA3352 (1/4) |
| Motility                                         | <i>pil</i> BSQ (19/53,3/9,15/36)<br><i>rpoN</i> (3/7)<br><i>cup C1C2C3A1A4B6B5B4B3B2B1</i> (10/21, 7/14, 10/36, 1/1, 1/6, 8/4, 16/25, 4/3, 3/16, 3/0, 10/4)                                |
| Glucose uptake pathway                           | <i>glk</i> (1/4)<br><i>fruk</i> ( <i>fpk</i> ) (3/9)                                                                                                                                       |
| Entner-Doudoroff (ED) Pathway                    | <i>zwf</i> (1/4)<br>PA2261 ( <i>kgk</i> ) (1/1)<br>PA2263 ( <i>kgr</i> ) (2/1)                                                                                                             |
| Glyoxylate Shunt (GS)                            | <i>aceA</i> (1/1)<br><i>glcB</i> (1/0)                                                                                                                                                     |
| TCA cycle                                        | PA0794 (2/8)<br><i>idh</i> (3/3)<br><i>sucA</i> (1/6)<br><i>fumC1</i> (1/1)                                                                                                                |
| Metabolism (Others)                              | <i>aceF</i> (2/1)<br><i>napFDA</i> (1/0, 1/2, 1/4)<br><i>norC</i> (1/0)<br><i>narK1K2I</i> (1/9, 1/4, 1/3)<br><i>nirFJN</i> (2/1, 3/0, 1/3)<br>PA0521 (1/0)                                |
| TTSS (PA1690-1725)                               | PA1700 (1/3)<br><i>pcrDV</i> (2/18, 5/5)<br><i>popBD</i> (2/2, 1/2)<br><i>exsCD</i> (1/3, 1/0)<br><i>pscBCDEILPQTU</i> (1/2, 1/5, 1/3, 2/1, 1/0, 2/5, 8/2, 4/4, 1/4, 1/4)                  |
| TTSS translocated effectors                      | <i>exoYT</i> (2/3, 4/11)                                                                                                                                                                   |
| Gac/Rsm pathway & T6SS (Hcp1 secretion island I) | <i>ladS</i> (3/8)<br>PA0078/80/82/84/88 (1/2, 2/0, 4/6, 1/2, 2/2)<br><i>icmF1</i> (1/6)<br><i>clpV1</i> (3/7)<br><i>vgrG1</i> (1/0)                                                        |
| Phenazine biosynthesis                           | <i>phzB2A2A1S</i> (1/9,1/1,1/0,3/16)                                                                                                                                                       |
| Tad locus                                        | <i>flp</i> (2/4)<br><i>rcpC</i> (2/2)                                                                                                                                                      |

|                  |                                                                                                   |
|------------------|---------------------------------------------------------------------------------------------------|
|                  | <i>tadG</i> (1/4)<br>PA4294( <i>tadF</i> ) (1/6)<br><i>pprAB</i> (9/46, 3/3)<br><i>fppA</i> (2/2) |
| Iron acquisition | <i>pvdQRTPNQEDJLG</i> (2/20,1/5, 3/9, 16/101, 2/12, 9/9, 1/0, 16/34, 4/16,18/63, 1/3)             |

**Table S3. Accession numbers for *P. aeruginosa* isolates.**

| Isolate | SRA_accession | Study     | Bioproject_accession | Biosample_accession | Genome_accession |
|---------|---------------|-----------|----------------------|---------------------|------------------|
| Pa270   | SRR8775051    | SRP189252 | PRJNA528628          | SAMN11241333        | SPIS00000000     |
| Pa338   | SRR8775050    | SRP189252 | PRJNA528628          | SAMN11241334        | SPIR00000000     |
| Pa339   | SRR8775058    | SRP189252 | PRJNA528628          | SAMN11241335        | SPIQ00000000     |
| Pa599   | SRR8775057    | SRP189252 | PRJNA528628          | SAMN11241336        | SPIP00000000     |
| Pa600   | SRR8775065    | SRP189252 | PRJNA528628          | SAMN11241337        | SPIO00000000     |
| Pa601   | SRR8775054    | SRP189252 | PRJNA528628          | SAMN11241338        | SPIN00000000     |
| Pa602   | SRR8775055    | SRP189252 | PRJNA528628          | SAMN11241339        | SPIM00000000     |
| Pa603   | SRR8775053    | SRP189252 | PRJNA528628          | SAMN11241340        | SPILO00000000    |
| Pa604   | SRR8775056    | SRP189252 | PRJNA528628          | SAMN11241341        | SPIK00000000     |
| Pa605   | SRR8775052    | SRP189252 | PRJNA528628          | SAMN11241342        | SPIJ00000000     |
| Pa606   | SRR8775060    | SRP189252 | PRJNA528628          | SAMN11241343        | SPII00000000     |
| Pa607   | SRR8775059    | SRP189252 | PRJNA528628          | SAMN11241344        | SPIH00000000     |
| Pa608   | SRR8775062    | SRP189252 | PRJNA528628          | SAMN11241345        | SPIG00000000     |
| Pa683   | SRR8775061    | SRP189252 | PRJNA528628          | SAMN11241346        | SPIF00000000     |
| Pa684   | SRR8775064    | SRP189252 | PRJNA528628          | SAMN11241347        | SPIE00000000     |
| Pa685   | SRR8775063    | SRP189252 | PRJNA528628          | SAMN11241348        | SPID00000000     |
| Pa686   | SRR8775066    | SRP189252 | PRJNA528628          | SAMN11241349        | SPIC00000000     |

**Table S4. PAMPs found mutated in all CF *P. aeruginosa* isolates.** Number of non-synonymous mutations found in all 17 CF *P. aeruginosa* isolates respect with PAO1. These genes belong to pathways that have been characterized as activators of the inflammasome. These data are plotted in Figure 5A.

| Pathway                          | Genes                               | Non-synonymous mutations (NSM) |
|----------------------------------|-------------------------------------|--------------------------------|
| LPS biogenesis and function      | PA0595; <i>osta</i> ( <i>lptD</i> ) | 7                              |
| LPS biogenesis and function      | PA5447; <i>wbpZ</i>                 | 7                              |
| LPS biogenesis and function      | PA4999; <i>waaL</i>                 | 3                              |
| LPS biogenesis and function      | PA5449; <i>wbpX</i>                 | 2                              |
| LPS biogenesis and function      | PA5452 <i>wbpW</i>                  | 1                              |
| LPS biogenesis and function      | PA5456                              | 1                              |
| LPS biogenesis and function      | PA5459                              | 0                              |
| LPS biogenesis and function      | PA5448; <i>wbpY</i>                 | 0                              |
| LPS biogenesis and function      | PA5450; <i>wzt</i>                  | 0                              |
| LPS biogenesis and function      | PA5451; <i>wzm</i>                  | 0                              |
| LPS biogenesis and function      | PA5453; <i>gmd</i>                  | 0                              |
| LPS biogenesis and function      | PA5454; <i>rmd</i>                  | 0                              |
| LPS biogenesis and function      | PA5455                              | 0                              |
| LPS biogenesis and function      | PA5457                              | 0                              |
| LPS biogenesis and function      | PA5458                              | 0                              |
| Flagella biogenesis and function | PA1092; <i>fliC</i>                 | 22                             |
| Flagella biogenesis and function | PA1087; <i>flgL</i>                 | 13                             |
| Flagella biogenesis and function | PA4954; <i>motA</i>                 | 3                              |
| Flagella biogenesis and function | PA1460; <i>motC</i>                 | 1                              |
| Flagella biogenesis and function | PA1461; <i>motD</i>                 | 1                              |
| Flagella biogenesis and function | PA1085; <i>flgJ</i>                 | 1                              |
| Flagella biogenesis and function | PA1100; <i>fliE</i>                 | 1                              |
| Flagella biogenesis and function | PA3526; <i>motY</i>                 | 0                              |
| Flagella biogenesis and function | PA4953; <i>motB</i>                 | 0                              |
| Flagella biogenesis and function | PA1077; <i>flgB</i>                 | 0                              |
| Flagella biogenesis and function | PA1078; <i>flgC</i>                 | 0                              |
| Flagella biogenesis and function | PA1079; <i>flgD</i>                 | 0                              |
| Flagella biogenesis and function | PA1080; <i>flgE</i>                 | 0                              |
| Flagella biogenesis and function | PA1081; <i>flgF</i>                 | 0                              |
| Flagella biogenesis and function | PA1082; <i>flgG</i>                 | 0                              |
| Flagella biogenesis and function | PA1083; <i>flgH</i>                 | 0                              |
| Flagella biogenesis and function | PA1084; <i>flgI</i>                 | 0                              |
| Flagella biogenesis and function | PA1084; <i>flgK</i>                 | 0                              |
| T3SS assembly and secretion      | PA1695; <i>pscP</i>                 | 8                              |
| T3SS assembly and secretion      | PA1706; <i>pcrV</i>                 | 5                              |
| T3SS assembly and secretion      | PA0044; <i>exoT</i>                 | 4                              |
| T3SS assembly and secretion      | PA1694; <i>pscQ</i>                 | 4                              |
| T3SS assembly and secretion      | PA1717; <i>pscD</i>                 | 3                              |
| T3SS assembly and secretion      | PA2191; <i>exoY</i>                 | 2                              |

|                                       |                     |    |
|---------------------------------------|---------------------|----|
| T3SS assembly and secretion           | PA1703; <i>pcrD</i> | 2  |
| T3SS assembly and secretion           | PA1708; <i>popB</i> | 2  |
| T3SS assembly and secretion           | PA1718; <i>pscE</i> | 2  |
| T3SS assembly and secretion           | PA1725; <i>pscL</i> | 2  |
| T3SS assembly and secretion           | PA1709; <i>popD</i> | 1  |
| T3SS assembly and secretion           | PA1698; <i>popN</i> | 1  |
| T3SS assembly and secretion           | PA1710; <i>exsC</i> | 1  |
| T3SS assembly and secretion           | PA1714; <i>exsD</i> | 1  |
| T3SS assembly and secretion           | PA1715; <i>pscB</i> | 1  |
| T3SS assembly and secretion           | PA1716; <i>pscC</i> | 1  |
| T3SS assembly and secretion           | PA1722; <i>pscI</i> | 1  |
| T3SS assembly and secretion           | PA1691; <i>pscT</i> | 1  |
| T3SS assembly and secretion           | PA1690; <i>pscU</i> | 1  |
| T3SS assembly and secretion           | PA3841; <i>exoS</i> | 0  |
| T3SS assembly and secretion           | PA1705; <i>pcrG</i> | 0  |
| T3SS assembly and secretion           | PA1713; <i>exsA</i> | 0  |
| T3SS assembly and secretion           | PA1712; <i>exsB</i> | 0  |
| T3SS assembly and secretion           | PA1719; <i>pscF</i> | 0  |
| T3SS assembly and secretion           | PA1720; <i>pscG</i> | 0  |
| T3SS assembly and secretion           | PA1721; <i>pscH</i> | 0  |
| T3SS assembly and secretion           | PA1723; <i>pscJ</i> | 0  |
| T3SS assembly and secretion           | PA1724; <i>pscK</i> | 0  |
| T3SS assembly and secretion           | PA1696; <i>pscO</i> | 0  |
| T3SS assembly and secretion           | PA1693; <i>pscR</i> | 0  |
| Type IV Pilus biogenesis and function | PA4526; <i>pilB</i> | 19 |
| Type IV Pilus biogenesis and function | PA5040; <i>pilQ</i> | 15 |
| Type IV Pilus biogenesis and function | PA4525; <i>pilA</i> | 0  |
| Type IV Pilus biogenesis and function | PA4528; <i>pilD</i> | 0  |
| Type IV Pilus biogenesis and function | PA5041; <i>pilP</i> | 0  |
| Type IV Pilus biogenesis and function | PA5042; <i>pilO</i> | 0  |
| Type IV Pilus biogenesis and function | PA5043; <i>pilN</i> | 0  |
| Type IV Pilus biogenesis and function | PA5044; <i>pilM</i> | 0  |

**Table S5. Sequences of the primers used for qRT-PCR.**

| Gene          | Primer name | Primer sequence (5'-3') | Reference                |
|---------------|-------------|-------------------------|--------------------------|
| <i>aceA</i>   | qaceA-F     | ACAGCCCGTCCTTCAACTGG    | This study               |
|               | qaceA-R     | AGCTTGTTGCGGTCGTAGGC    | This study               |
| <i>acnA</i>   | qacnA-F     | GGCGAAGAAGGCAGTGGAGA    | This study               |
|               | qacnA-R     | CGACCAGATCGAAGCCGAGT    | This study               |
| <i>acnB</i>   | qacnB-F     | ATTCCTTCCGCCATCGTCA     | This study               |
|               | qacnB-R     | ATGTTGTAGCCGCCCTGCAT    | This study               |
| <i>citA</i>   | qcitA-F     | CGTCGAGTTGTGGCTGTCGT    | This study               |
|               | qcitA-R     | CAGGCTGTAGGCGAGGGAGA    | This study               |
| <i>crc</i>    | qcrc-F      | TCCTTCCAAGTGGACGGCTA    | Janjua et al., 2012 (45) |
|               | qcrc-R      | AGCAGGGTGGCGATACTCAC    | Janjua et al., 2012 (45) |
| <i>dctA</i>   | qdctA-F     | CTTCAACCTCGACGGCACCT    | This study               |
|               | qdctA-R     | CTTGAAGCGATCAGCAGCA     | This study               |
| <i>fruk</i>   | qfruK-F     | AGCCGAACGTCGAGGAACTG    | This study               |
|               | qfruK-R     | CCCTGGGAAATCACCACCTG    | This study               |
| <i>fumC1</i>  | qfumC1-F    | CATGAACGCCAACGAAGTGG    | This study               |
|               | qfumC1-R    | CGGCACTGATGTGGATGGTC    | This study               |
| <i>fumC2</i>  | qfumC2-F    | CGCACATCGGCTACGACAAG    | This study               |
|               | qfumC2-R    | GAAGTGCCTTCGTCCAGGT     | This study               |
| <i>glcB</i>   | qglcB-F     | CGCCACTTCTACAGCGTGA     | This study               |
|               | qglcB-R     | GCCCTGGAAGGCAAGGAACT    | This study               |
| <i>glk</i>    | qglk-F      | CTCGGTGGCGTCTACATTAC    | This study               |
|               | qglk-R      | GTAAGCGCCGCTAGTCTT      | This study               |
| <i>glpD</i>   | qglpD-F     | TTCGCCATCCCCTATCTGGA    | This study               |
|               | qglpD-R     | GCTGCTTCAAATGGGCGTTC    | This study               |
| <i>idh</i>    | qidh-F      | GGCGATGATCCGCAACTC      | Tatke et al., 2015 (21)  |
|               | qidh-R      | GCATTACCGCCTTGGTGTCT    | Tatke et al., 2015 (21)  |
| <i>icd</i>    | qicd-F      | GCGACCGGTGACAAAATCAC    | Tatke et al., 2015 (21)  |
|               | qicd-R      | GGTTCTTCGGTACGCTCAA     | Tatke et al., 2015 (21)  |
| <i>lpd3</i>   | qlpd3-F     | CATGCGGCGGAGATGAAC      | Tatke et al., 2015 (21)  |
|               | qlpd3-R     | ACTTCCGGCTGGGTGTAGATG   | Tatke et al., 2015 (21)  |
| <i>motA</i>   | qmotA-F     | GTACCCCGGTGTGCTGAAGG    | This study               |
|               | qmotA-R     | AACAGGCCTTCCAGCTCGTG    | This study               |
| <i>ostA</i>   | qostA-F     | CCTGCCCTACAACCCAGGTG    | This study               |
|               | qostA-R     | ATGCTGCCGTCGTCATTGAA    | This study               |
| <i>PA0794</i> | qPA0794-F   | CTGCCGACAACATCACCAC     | This study               |
|               | qPA0794-R   | GGCCATTTTCGCCAGGTAT     | This study               |
| <i>PA4333</i> | qPA4333-F   | GCTCAACGGCAAGATGCTCA    | This study               |
|               | qPA4333-R   | AGCGTTTCGCCCTTGTTCAAG   | This study               |
| <i>pgi</i>    | qpgi-F      | CCGACCACCTGCAACAACCTG   | This study               |
|               | qpgi-R      | GGGATCAACTGGGTGCCTTG    | This study               |
| <i>pilB</i>   | qpilB-F     | ATCTCCGAACGACGCAAACC    | This study               |

|             |         |                       |                             |
|-------------|---------|-----------------------|-----------------------------|
|             | qpilB-R | ACGATCTTCTCGCCCCACAG  | This study                  |
| <i>pilQ</i> | qpilQ-F | AGCTATGCCCAGCCGATCAA  | This study                  |
|             | qpilQ-R | CAGGTGCGATGACCACGTTGC | This study                  |
| <i>pscP</i> | qpscP-F | TGGCCAGTTGCAGATCGAGA  | This study                  |
|             | qpscP-R | GCTGTCCTGCTGCTGGTTGA  | This study                  |
| <i>rpoN</i> | qrpoN-F | ATGACGAGTGGGACTTCACC  | This study                  |
|             | qrpoN-R | TCTTCGAGGTAGCCATCGTT  | This study                  |
| <i>rpsL</i> | qRpsL-F | CGGCACTGCGTAAGGTATGC  | This study                  |
|             | qRpsL-R | CGTACTTCGAACGACCCTGCT | This study                  |
| <i>sdhA</i> | qsdhA-F | GCGCTGGAAGTGC AAAACCT | This study                  |
|             | qsdhA-R | CCGGGAAGTACAGGGTGTGG  | This study                  |
| <i>sdhB</i> | qsdhB-F | GACCTCCTGCCCCTCTCT    | This study                  |
|             | qsdhB-R | GCGCTCTTCGGTCTTGGTGT  | This study                  |
| <i>sdhC</i> | qsdhC-F | TTCCTCGGTATTGCCGTGCT  | This study                  |
|             | qsdhC-R | GACAGCAGGCCCCAGATCAC  | This study                  |
| <i>sdhD</i> | qsdhD-F | CTCCGGCCTCTACGACTGGA  | This study                  |
|             | qsdhD-R | GCATCCAACCCTGCGAGAAC  | This study                  |
| <i>sucA</i> | qsucA-F | CTGCAGCCAGCATCACATG   | Tatke et al., 2015 (21)     |
|             | qsucA-R | CGAGATTGAGGCCCTTCTTG  | Tatke et al., 2015 (21)     |
| <i>sucB</i> | qsucB-F | ATCTCCAACGGTGGCGTGTT  | This study                  |
|             | qsucB-R | CATCATCGGCAGGATCACCA  | This study                  |
| <i>sucC</i> | qsucC-F | AGCGAGTGGGTCGTCAAAGC  | This study                  |
|             | qsucC-R | TTGGCGTCGGTCTGGTAGGT  | This study                  |
| <i>sucD</i> | qsucD-F | ATCCCGGGCTCCAACCTCAT  | This study                  |
|             | qsucD-R | GTAGGACACCACGGCTTGG   | This study                  |
| <i>waal</i> | qwaal-F | CTACGCCAGATCAGCGAGCA  | This study                  |
|             | qwaal-R | CCTCCAGCGAAAAGCACACC  | This study                  |
| <i>wbpX</i> | qwbpX-F | GAGACCATCCGCGACGAAGT  | This study                  |
|             | qwbpX-R | TCCTCCACCAGGTCCAGCTC  | This study                  |
| <i>wbpZ</i> | qwbpZ-F | GCTCCGCCAGTACCGAGAAA  | This study                  |
|             | qwbpZ-R | ATCACCCGACGAACAGGAA   | This study                  |
| <i>zwf</i>  | qzwf-F  | GAAGGTATCTCCCTGCAAGT  | McCaughey et al., 2013 (46) |
|             | qzwf-R  | GGTAGGTCTCGGAAAAACTC  | McCaughey et al., 2013 (46) |
